# Supplementary material
Source: PubMed Central journal article supplement (PMC5420341)

Table S1. Basic characteristics of men across cardiorespiratory fitness groups: Aerobics Center Longitudinal Study (ACLS), 1970-2003

| Characteristics           | Cardiorespiratory Fitness <sup>a</sup> |             |             |              | P value |
|---------------------------|----------------------------------------|-------------|-------------|--------------|---------|
|                           | All                                    | Low         | Moderate    | High         |         |
|                           | (N=41,528),                            | (N =6,687), | (N=16,535), | (N =18,306), |         |
|                           | mean (SD)                              | mean (SD)   | mean (SD)   | mean (SD)    |         |
| or %                      | or %                                   | or %        | or %        |              |         |
| Age,yr                    | 43.3 ( 9.3)                            | 42.2 ( 8.6) | 43.5 ( 9.1) | 43.5 ( 9.3)  | <.001   |
| BMI,kg/m <sup>2</sup>     | 26.5 ( 3.8)                            | 29.6 ( 5.2) | 26.9 ( 3.3) | 25.0 ( 2.6)  | <.001   |
| Total cholesterol, mmol/L | 5.4 ( 1.1)                             | 5.7 ( 1.1)  | 5.5 ( 1.0)  | 5.2 ( 1.2)   | <.001   |
| Fasting glucose, mmol/L   | 5.6 ( 2.7)                             | 5.8 ( 1.3)  | 5.6 ( 0.9)  | 5.5 ± 3.9    | <.001   |
| Blood pressure, mm Hg     |                                        |             |             |              |         |
| Systolic                  | 122 ( 13)                              | 125 ( 14)   | 122 ( 13)   | 120 ( 13)    | <.001   |
| Diastolic                 | 81 (10)                                | 84 (10)     | 82 ( 10)    | 80 (9)       | <.001   |
| Current smoker, %         | 17.4                                   | 30.8        | 20.2        | 10.1         | <.001   |
| Heavy drinking, %         | 7.2                                    | 5.8         | 7.2         | 7.8          | <.001   |

|                                        |      |      |      |      |       |
|----------------------------------------|------|------|------|------|-------|
| Physical inactivity, %                 | 32.6 | 65.8 | 40.2 | 13.6 | <.001 |
| Diabetes mellitus,(%                   | 4.8  | 9.3  | 5.1  | 2.9  | <.001 |
| Hypertension, %                        | 30.7 | 43.6 | 32.7 | 24.0 | <.001 |
| Hypercholesterolemia, %                | 27.4 | 35.1 | 30.2 | 22.2 | <.001 |
| Low fat dietary restriction, %         | 6.9  | 4.1  | 5.8  | 8.9  | <.001 |
| Low cholesterol dietary restriction, % | 5.0  | 2.7  | 4.1  | 6.8  | <.001 |

---

BMI=body mass index; MET=metabolic equivalent; SD=standard deviation.

P value: ANOVA test for continuous variables or Chi-square tests for categorical variables across three fitness groups.

<sup>a</sup> Cardiorespiratory fitness was classified as low, moderate, and high based on cutpoints developed from age- and sex-specific distributions of treadmill time duration among the ACLS population[17].

Table S2. Basic characteristics of women across cardiorespiratory fitness groups: Aerobics Center Longitudinal Study (ACLS), 1970-2003

| Characteristics                         | Cardiorespiratory Fitness <sup>a</sup> |             |              |             | <i>P</i> value |
|-----------------------------------------|----------------------------------------|-------------|--------------|-------------|----------------|
|                                         | All                                    | Low         | Moderate     | High        |                |
|                                         | (N=13,206),                            | (N =1,653), | (N =4,618),  | (N =6,935), |                |
|                                         | mean (SD)                              | mean (SD)   | mean (SD)    | mean (SD)   |                |
| or %                                    | or %                                   | or %        | or %         |             |                |
| Age, yr                                 | 43.2 ( 10.2)                           | 42.8 ( 9.7) | 43.1 ( 10.1) | 43.4 (10.4) | .002           |
| BMI, kg/m <sup>2</sup>                  | 23.3 ( 4.0)                            | 26.7 ( 6.2) | 23.8 ( 3.9)  | 22.2 ( 2.7) | <.001          |
| Total cholesterol, mmol.L <sup>-1</sup> | 5.2 (±1.0)                             | 5.4 ( 1.0)  | 5.3 ( 1.0)   | 5.1 ( 1.1)  | <.001          |
| Fasting glucose, mmol.L <sup>-1</sup>   | 5.2 ( 4.6)                             | 5.4 ( 1.1)  | 5.2 ( 0.7)   | 5.2 ( 6.4)  | .43            |
| Blood pressure, mm Hg                   |                                        |             |              |             |                |
| Systolic                                | 112 ( 14)                              | 116 ( 15)   | 113 ( 14)    | 111 (14)    | <.001          |
| Diastolic                               | 76 ( 10)                               | 78 ( 10)    | 76 ( 10)     | 75 ( 9)     | <.001          |
| Current smoker, %                       | 9.9                                    | 16.4        | 12.2         | 6.7         | <.001          |
| Heavy drinking, %                       | 9.4                                    | 3.7         | 7.2          | 12.2        | <.001          |

|                                        |      |      |      |      |       |
|----------------------------------------|------|------|------|------|-------|
| Physical inactivity, %                 | 28.0 | 62.6 | 38.0 | 13.1 | <.001 |
| Diabetes mellitus, %                   | 3.4  | 4.7  | 3.8  | 2.9  | <.001 |
| Hypertension, %                        | 16.2 | 25.4 | 17.5 | 13.2 | <.001 |
| Hypercholesterolemia, %                | 20.2 | 23.8 | 22.0 | 18.2 | <.001 |
| Low fat dietary restriction, %         | 12.8 | 6.5  | 10.4 | 16.0 | <.001 |
| Low cholesterol dietary restriction, % | 6.8  | 3.3  | 5.9  | 8.3  | <.001 |

BMI=body mass index; MET=metabolic equivalent; SD=standard deviation.

P value: ANOVA test for continuous variables or Chi-square tests for categorical variables across three fitness groups.

<sup>a</sup> Cardiorespiratory fitness was classified as low, moderate, and high based on cutpoints developed from age- and sex-specific distributions of treadmill time duration among the ACLS population[17].

Table S3. Prevalence and adjusted odds ratios for gallbladder disease by cardiorespiratory fitness (CRF) levels in men and women.

|                           | Cases/N   | Prevalence | OR (95% CI)          |                      |
|---------------------------|-----------|------------|----------------------|----------------------|
|                           |           |            | Model 1 <sup>a</sup> | Model 2 <sup>b</sup> |
| <b>Men (N=41,528)</b>     |           |            |                      |                      |
| Low CRF                   | 47/6,687  | 0.70%      | 1.00                 | 1.00                 |
| Moderate CRF              | 90/16,535 | 0.54%      | 0.54 (0.38-0.78)     | 0.76 (0.51-1.14)     |
| High CRF                  | 79/18,306 | 0.43%      | 0.38 (0.26-0.55)     | 0.64 (0.40-1.02)     |
| <i>P</i> for linear trend |           | .03        | <.001                | .07                  |
| <b>Women (N=13,206)</b>   |           |            |                      |                      |
| Low CRF                   | 45/1,653  | 2.72%      | 1.00                 | 1.00                 |
| Moderate CRF              | 94/4,618  | 2.04%      | 0.44 (0.30-0.65)     | 0.69 (0.45-1.06)     |
| High CRF                  | 121/6,935 | 1.74%      | 0.26 (0.18-0.38)     | 0.51 (0.32-0.83)     |
| <i>P</i> for linear trend |           | .03        | <.001                | .005                 |

OR=odds ratio; CI=confidence interval.

<sup>a</sup>Adjusted for age and examination year.

<sup>b</sup> Adjusted for age, examination year, body mass index, physical inactivity, current smoker, heavy drinking, diabetes mellitus, hypertension, hypercholesterolemia, low fat dietary restriction, and low cholesterol dietary restriction.

Figure S1. Multivariate<sup>a</sup> aORs (95% CIs) of gallbladder disease stratified by CRF and age, diabetes mellitus, and physical activity for men; <sup>a</sup>Adjusted for age, examination year, body mass index, physical inactivity, current smoker, heavy drinking, diabetes mellitus, hypertension, hypercholesterolemia, low fat dietary restriction, and low cholesterol dietary restriction. \*P for linear trend < .05. Error bars indicate 95% CIs. aOR=adjusted odds ratio; CI=confidence interval; CRF=cardiorespiratory fitness.

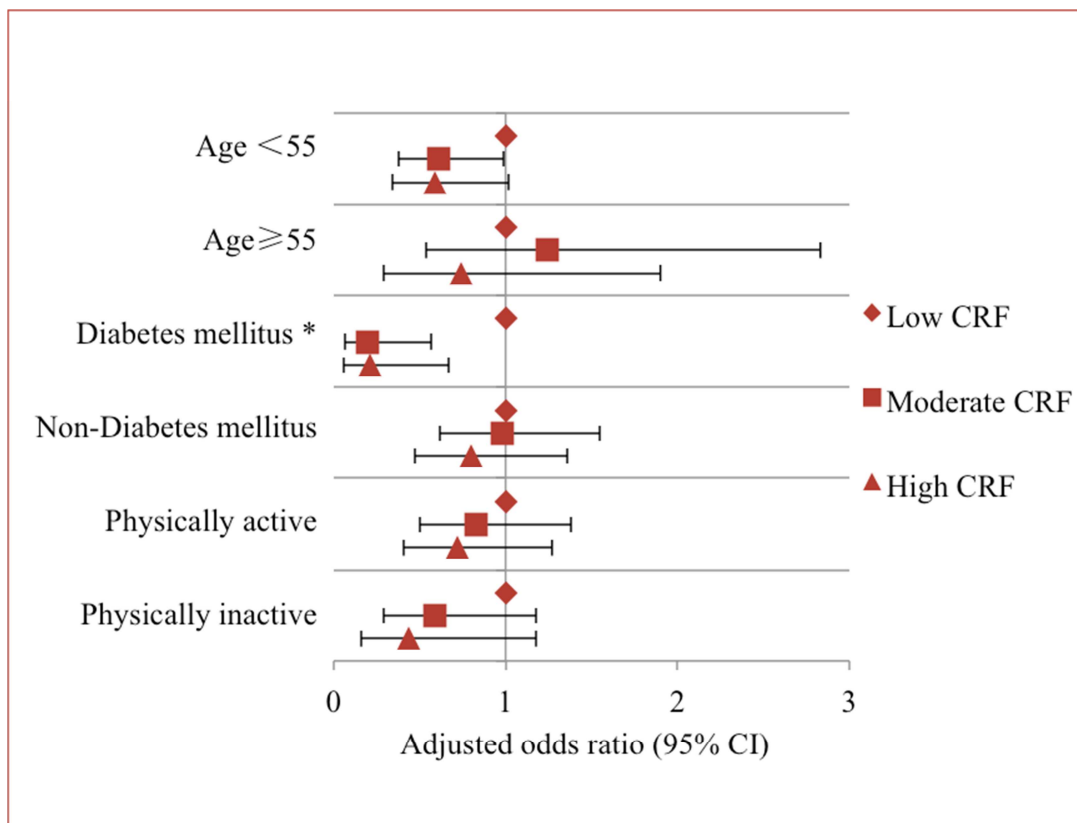

Figure S2. Multivariate<sup>a</sup> aORs (95% CIs) of gallbladder disease stratified by CRF and age, diabetes mellitus, and physical activity for women; <sup>a</sup>Adjusted for age, examination year, body mass index, physical inactivity, current smoker, heavy drinking, diabetes mellitus, hypertension, hypercholesterolemia, low fat dietary restriction, and low cholesterol dietary restriction. \*P for linear trend < .05. \*\*P for linear trend < .01. Error bars indicate 95% CIs. aOR=adjusted odds ratio; CI=confidence interval; CRF=cardiorespiratory fitness.

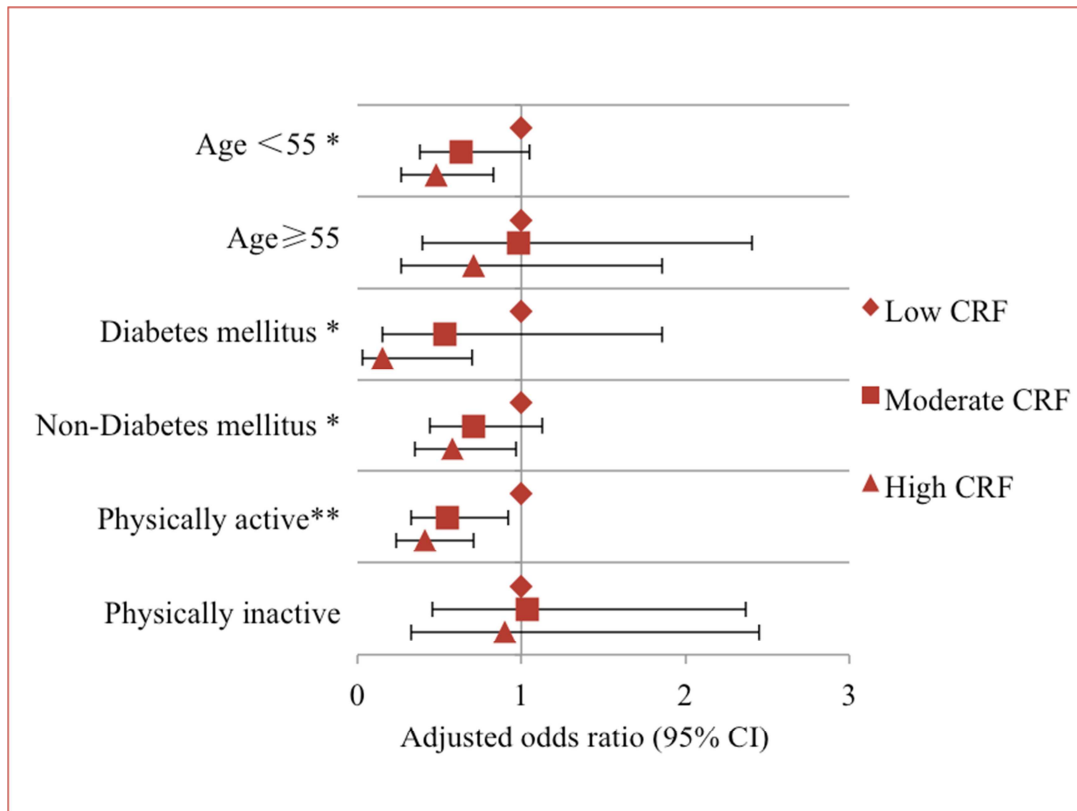

Supplement: NIHMS831366-supplement-01.pdf [file NIHMS831366-supplement-01.pdf]
